# Supplementary material
Source: PubMed Central journal article supplement (PMC6625754)
Supplement: NIHMS1037653-supplement-1.pdf [file NIHMS1037653-supplement-1.pdf]

**OnlineTable. Exercise and physical data per individual in the exercise group**

| Case No.                                                        | 1     | 2     | 3    | 4    | 5     | 6    | 7    | 8    | 9     | 10    | 11   | 12   | 13   | 14   | 15    | 16    | 17   | 18    | 19   | 20    | 21   | 22   | 23   | mean |
|-----------------------------------------------------------------|-------|-------|------|------|-------|------|------|------|-------|-------|------|------|------|------|-------|-------|------|-------|------|-------|------|------|------|------|
| <b>Patient characteristics</b>                                  |       |       |      |      |       |      |      |      |       |       |      |      |      |      |       |       |      |       |      |       |      |      |      |      |
| Sex (M/F)                                                       | M     | F     | M    | F    | F     | F    | F    | F    | M     | F     | F    | F    | M    | F    | M     | M     | F    | M     | M    | F     | M    | M    | F    | -    |
| Age                                                             | 46    | 49    | 46   | 31   | 50    | 55   | 63   | 49   | 51    | 47    | 53   | 36   | 51   | 34   | 48    | 48    | 63   | 68    | 40   | 35    | 39   | 40   | 40   | -    |
| Specific situation*                                             | -     | -     | R    | S    | -     | -    | -    | T    | -     | T     | U    | -    | V    | -    | W     | -     | -    | X     | -    | -     | Y    | Z    | -    | -    |
| Epilepsy                                                        | Yes   | Yes   | Yes  | Yes  | No    | No   | Yes  | No   | No    | Yes   | Yes  | Yes  | Yes  | Yes  | Yes   | Yes   | No   | Yes   | Yes  | Yes   | Yes  | Yes  | No   | -    |
| AED                                                             | Yes   | No    | Yes  | Yes  | No    | No   | No   | No   | Yes   | Yes   | Yes  | Yes  | Yes  | Yes  | Yes   | Yes   | No   | Yes   | Yes  | No    | Yes  | No   | No   | -    |
| <b>Physical exercise program</b>                                |       |       |      |      |       |      |      |      |       |       |      |      |      |      |       |       |      |       |      |       |      |      |      |      |
| Type of sport#                                                  | C     | M     | R    | M    | M     | C    | M    | M    | C     | C     | C    | M    | M    | C    | M     | M     | M    | M     | M    | M     | M    | S    | M    | -    |
| Duration of intervention (weeks)                                | 25    | 23    | 15   | 10   | 25    | 25   | 25   | 24   | 24    | 24    | 18   | 23   | 25   | 24   | 23    | 25    | 24   | 25    | 25   | 25    | 11   | 23   | 24   | 22   |
| Attended training-days                                          | 75    | 69    | 43   | 23   | 74    | 47   | 72   | 39   | 65    | 28    | 27   | 63   | 46   | 68   | 28    | 67    | 70   | 60    | 67   | 58    | 27   | 36   | 65   | 53   |
| Adherence                                                       | 100   | 100   | 96   | 77   | 99    | 63   | 96   | 54   | 90    | 39    | 50   | 91   | 61   | 94   | 41    | 89    | 97   | 80    | 89   | 77    | 82   | 52   | 90   | 79   |
| Total training time (min)                                       | 2908  | 3144  | 1542 | 855  | 2938  | 3109 | 2922 | 2567 | 2514  | 633   | 575  | 2995 | 8056 | 3643 | 2688  | 3666  | 3426 | 2759  | 5211 | 2083  | 1646 | 1599 | 4449 | 2866 |
| Average intensity (% of MHR)                                    | 77    | 87    | 84   | 72   | 78    | 75   | 72   | 77   | 76    | 71    | 75   | 71   | 79   | 73   | 69    | 84    | 78   | 75    | 68   | 77    | 77   | 72   | 74   | 76   |
| Overall exercise performance™                                   | A     | A     | A    | A    | A     | B    | A    | C    | A     | C     | C    | A    | B    | A    | C     | A     | A    | A     | A    | A     | A    | B    | A    | -    |
| <b>Self-reported physical activity, categorical<sup>o</sup></b> |       |       |      |      |       |      |      |      |       |       |      |      |      |      |       |       |      |       |      |       |      |      |      |      |
| • Baseline                                                      | 2     | 3     | 3    | 3    | 2     | 2    | 2    | 3    | 3     | 3     | 2    | 3    | 3    | 3    | 3     | 3     | 2    | 3     | 2    | 1     | 2    | 3    | 3    | -    |
| • 6 months                                                      | 3     | 3     | 3    | NA   | 2     | NA   | 3    | 3    | 3     | 3     | 2    | 3    | 3    | 3    | 3     | 3     | 3    | 3     | 3    | 2     | NA   | 3    | 3    | -    |
| • Change, absolute                                              | +1    | 0     | 0    | NA   | 0     | NA   | +1   | 0    | 0     | 0     | 0    | 0    | 0    | 0    | 0     | 0     | +1   | 0     | +1   | +1    | NA   | 0    | 0    | -    |
| <b>Weight, kg</b>                                               |       |       |      |      |       |      |      |      |       |       |      |      |      |      |       |       |      |       |      |       |      |      |      |      |
| • Baseline                                                      | 103   | 77    | 87   | 69   | 104   | 93   | 65   | 95   | 80    | 97    | 76   | 76   | 103  | 73   | 84    | 93    | 79   | 79    | 77   | 95    | 84   | 76   | 86   | 85   |
| • 6 months                                                      | 102   | 77    | 90   | NA   | 101   | 89   | 66   | 95   | 77    | 97    | NA   | 75   | NA   | 73   | 83    | 91    | 79   | 77    | 73   | 91    | NA   | 74   | 87   | 84   |
| • Change, absolute                                              | -1    | 0     | +3   | NA   | -3    | -4   | +1   | 0    | -3    | 0     | NA   | -1   | NA   | 0    | -1    | -2    | 0    | -2    | -4   | -4    | NA   | -2   | +1   | -1   |
| <b>BMI, kg/m<sup>2</sup></b>                                    |       |       |      |      |       |      |      |      |       |       |      |      |      |      |       |       |      |       |      |       |      |      |      |      |
| • Baseline                                                      | 28.8  | 27.3  | 26.4 | 24.4 | 34.0  | 31.3 | 22.0 | 30.7 | 25.0  | 31.0  | 25.4 | 25.7 | 31.1 | 27.4 | 25.9  | 28.4  | 27.3 | 24.2  | 25.7 | 30.3  | 26.8 | 23.5 | 25.4 | 27.3 |
| • 6 months                                                      | 28.6  | 27.3  | 27.3 | NA   | 33.0  | 29.9 | 22.3 | 30.7 | 24.0  | 31.0  | NA   | 25.4 | NA   | 27.5 | 25.6  | 27.8  | 27.3 | 23.6  | 24.4 | 29.0  | NA   | 22.8 | 25.7 | 27.0 |
| • Change, absolute                                              | -0.2  | 0     | +0.9 | NA   | -1.0  | -1.3 | +0.3 | 0    | -1.0  | 0     | NA   | -0.3 | NA   | 0    | -0.3  | -0.6  | 0    | -0.6  | -1.3 | -1.4  | NA   | -0.6 | +0.3 | -0.3 |
| <b>VO<sub>2</sub>peak Absolute, ml/min</b>                      |       |       |      |      |       |      |      |      |       |       |      |      |      |      |       |       |      |       |      |       |      |      |      |      |
| • Baseline                                                      | 3193  | 1540  | 3040 | 1696 | 1854  | 1483 | 1150 | 2157 | 2495  | 1443  | 1564 | 1952 | 3857 | 2194 | 2386  | 3606  | 1375 | 2399  | 2900 | 2011  | 2768 | 2148 | 2586 | 2252 |
| • 6 months                                                      | 3907  | 1946  | 3133 | NA   | 2006  | 1567 | 1219 | 2020 | 3012  | 1645  | NA   | 2056 | NA   | 2342 | 1953  | 3896  | 1495 | 2078  | 2860 | 2370  | NA   | 2197 | 2741 | 2339 |
| • Change, absolute                                              | +714  | +406  | +93  | NA   | +152  | +84  | +69  | -63  | +517  | +202  | NA   | +102 | NA   | +148 | -433  | +290  | +120 | -321  | -40  | +359  | NA   | +49  | +155 | +133 |
| • % Change                                                      | +22.4 | +26.4 | +3.1 | NA   | +8.2  | +5.7 | +6.0 | -2.9 | +20.7 | +14.0 | NA   | +5.2 | NA   | +6.7 | -18.1 | +8.0  | +8.7 | -13.4 | -1.4 | +17.9 | NA   | +2.3 | +6.0 | +5.9 |
| <b>VO<sub>2</sub>peak Relative, ml/kg/min</b>                   |       |       |      |      |       |      |      |      |       |       |      |      |      |      |       |       |      |       |      |       |      |      |      |      |
| • Baseline                                                      | 31.0  | 20.0  | 34.9 | 24.6 | 17.8  | 16.0 | 17.7 | 22.7 | 31.2  | 14.9  | 20.6 | 25.7 | 37.5 | 30.1 | 28.4  | 38.8  | 17.4 | 30.4  | 37.7 | 21.2  | 33.0 | 28.3 | 30.1 | 26.5 |
| • 6 months                                                      | 38.3  | 25.0  | 34.8 | NA   | 19.9  | 17.6 | 18.5 | 21.3 | 39.1  | 17.0  | NA   | 27.4 | NA   | 32.1 | 23.5  | 42.8  | 18.9 | 27.0  | 39.2 | 26.6  | NA   | 29.7 | 31.6 | 27.9 |
| • Change, absolute                                              | +7.3  | +5.0  | -0.1 | NA   | +2.1  | +1.6 | +0.8 | -1.4 | +7.9  | +2.1  | NA   | +1.7 | NA   | +2.0 | -4.9  | +4.0  | +1.5 | -2.6  | +1.5 | +5.4  | NA   | +1.4 | +0.5 | +1.9 |
| • % Change                                                      | +23.5 | +25.0 | 0.0  | NA   | +11.8 | +8.9 | +4.5 | -6.2 | +25.3 | +6.7  | NA   | +6.6 | NA   | +6.7 | -17.2 | +10.3 | +8.6 | -8.6  | +4.0 | +25.5 | NA   | +4.9 | +1.7 | +7.2 |

\*Specific situation: R= shorter intervention due to progressive disease, but performed exercise test; S= drop-out due to extreme fatigue; T=low adherence due to lack of time/motivation; U=shorter intervention and missing follow-up exercise test due to progressive disease; V= missing follow-up exercise test data due to lack of time/motivation for exercise test; W= low adherence due to family/psychosocial problems; X= follow-up exercise test: pain due to knee osteoarthritis; Y=decreased frequency of exercise sessions due to continuing frequent epileptic seizures; shorter intervention and missing follow-up exercise test due to progressive disease; Z=low adherence due to ear ache (medical advice not to swim).

AED: anti-epileptic drugs; MHR: maximum heart rate; NA= not available

#Type of sport: C=cycling; R=running/walking; S=swimming; M=multiple sports; ™Overall exercise performance: A=excellent/good; B=adequate; C= inadequate; <sup>o</sup>Physical activity categories: 1= low (<600 MET\*min/week); 2=moderate (600-1,499 MET\*min/week); 3=high (≥1,500 MET\*min/week) [19, 18]

**Online Box. Quotes of patients of the exercise group**

*"This is the first week since my diagnosis that I feel really fit during the whole day. My husband noticed it as well. It feels really... pleasurable."*

*"My friends are still surprised about my change of lifestyle. A day without my routine bike trip feels as an incomplete day."*

*"I find the heartrate watch is difficult to use, which frustrates me."*

*"Both the website, where you can see a summary of your training logs, and the fact that someone is keeping an eye on you, worked very motivating."*
